# Supplementary material for: Hyperosmotic tolerance of adult fish and early embryos are determined by discrete, single loci in the genus Oryzias
Source: PubMed Central journal article supplement (PMC5932013; doi:10.1038/s41598-018-24621-7), 2018-05-02
Supplement: 41598_2018_24621_MOESM1_ESM.pdf [file 41598_2018_24621_MOESM1_ESM.pdf]

Hyperosmotic tolerance of adult fish and early embryos are determined by discrete, single loci in the genus *Oryzias*

Taijun Myosho<sup>1,2</sup>, Hideya Takahashi<sup>2,3</sup>, Kento Yoshida<sup>2</sup>, Tadashi Sato<sup>2</sup>, Satoshi Hamaguchi<sup>2</sup>, Tatsuya Sakamoto<sup>3</sup>, and Mitsuru Sakaizumi<sup>2</sup>

<sup>1</sup>Laboratory of Molecular Reproductive Biology, Institute for Environmental Science, University of Shizuoka, Shizuoka, Shizuoka 422-8526, Japan

<sup>2</sup>Department of Environmental Science, Institute of Science and Technology, Niigata University, Ikarashi, Niigata 950-2181, Japan

<sup>3</sup>Ushimado Marine Institute, Faculty of Science, Okayama University, Setouchi, Okayama 701-4303, Japan

Correspondence and requests for materials should be addressed to T.M.

(taijun@u-shizuoka-ken.ac.jp)

Supplemental Figure 1

Additional survival tests of *Oryzias woworae* after by gradual and indirect transition of fresh water (FW) in the aquaria to hypertonic half-strength sea water (1/2 SW), and transition of 1/2 SW to full-strength sea water (SW). The transitions were completed about 5 h. In both of the two tests, thirty percent individuals of *O. woworae* survived in 1/2 SW, and all individuals died in SW. The numbers above the column indicate the total number of individuals in each test.

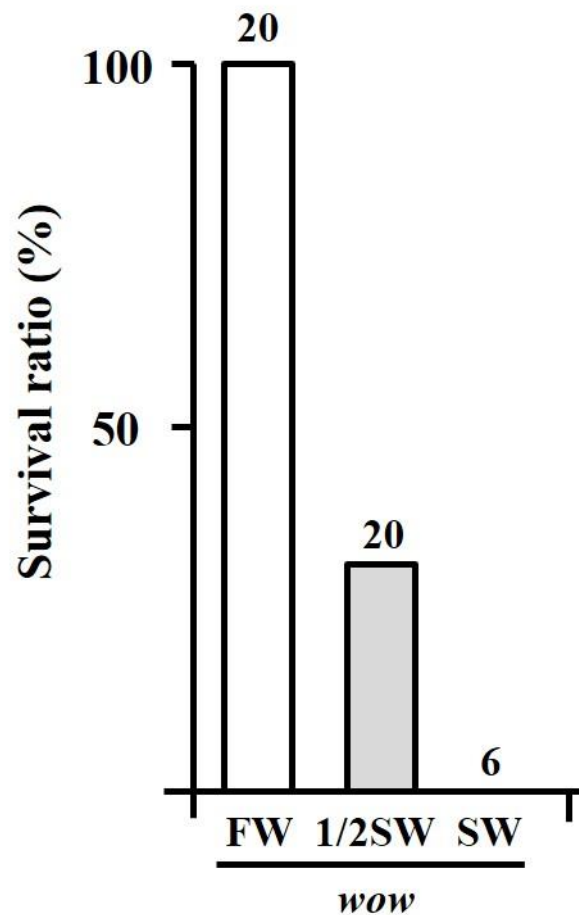

## Supplemental Figure 2

The 50% majority-rule consensus tree of a maximum likelihood of the *COI* region

The *COI* sequence of the commercial *Oryzias woworae* in this study completely matched with two native *O. woworae* sequences. Furthermore, the commercial *O. woworae* made a clade with two local *O. woworae*. The *COI* sequence was determined by PCR-direct sequence using previously designed primers<sup>1</sup>. The *COI* sequences were preliminarily aligned in MEGA 5.1 using ClustalW<sup>2</sup>. The phylogenetic relationships were analyzed by maximum likelihood. The GenBank accession numbers of the DNA sequences are as follows: *COI* sequences, JX311925- JX311944.

1. Parenti, L. R., Hadiaty, R.K., Lumbantobing, D. & Herder, F. Two new ricefishes of the genus *Oryzias* (Atherinomorpha: Beloniformes: Adrianichthyidae) augment the endemic freshwater fish fauna of southeastern Sulawesi, Indonesia. *Copeia* **3**, 403-414 (2013).
2. Tamura, K. *et al.* MEGA5: molecular evolutionary genetics analysis using maximum likelihood, evolutionary distance, and maximum parsimony methods. *Mol biol evol.* **28**, 2731-2739 (2011).

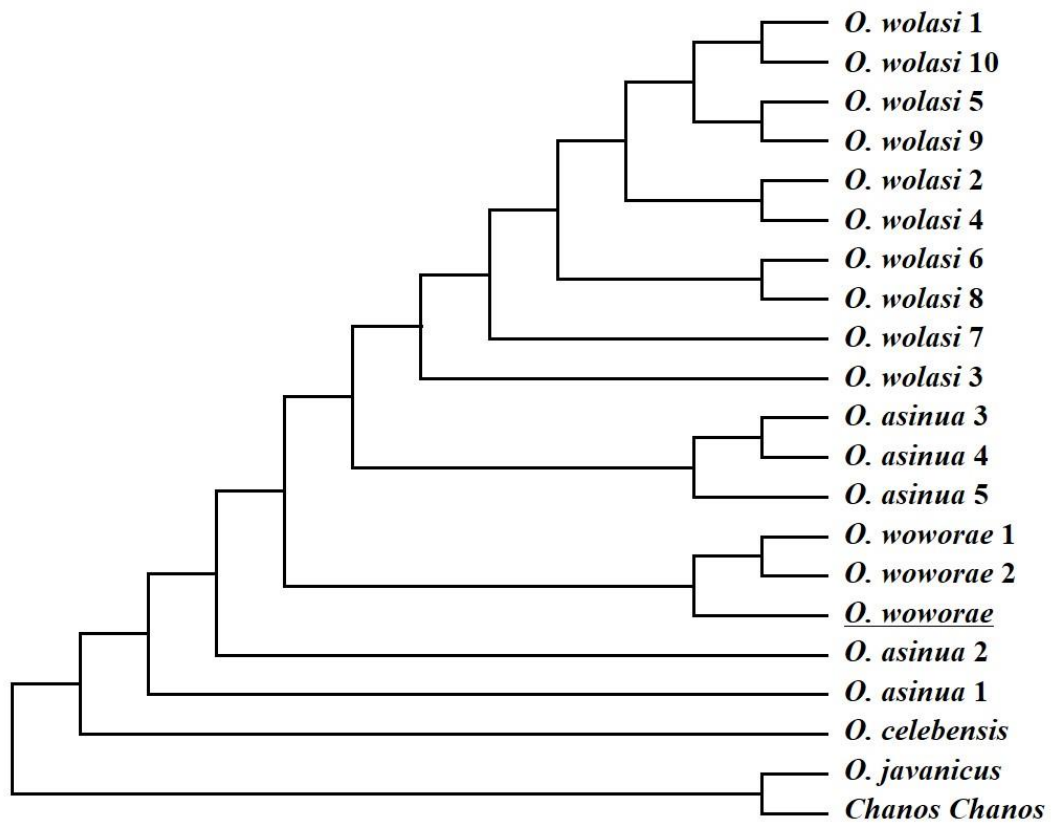

Supplementary Table 1

EST an STS primers for constructing linkage map of embryonic and adult hyperosmotic tolerance

| LG | Name            | forward                      | reverse                      |
|----|-----------------|------------------------------|------------------------------|
| 6  | MPHOSPH         | TCCAAGAATCTGCTGCGCATGAAG     | CCTCCTCTCGTCTTCCTCCAGC       |
|    | RFWD3           | AGGTCTCTGGAGCAGGAACAG        | CCAGCACCGCCTTGGAGAAG         |
|    | CPA4            | ACAGCTGGATGGACACTCTG         | GGGTTGGCCAGAATCAGCATG        |
|    | 2.9B            | AGCTTTCCAGAACTGGCTGA         | TGGCGTCCATTTTGAAGATT         |
|    | 2.9c            | GGCCATCAAGTTTCTTTCCA         | GCTACACGCATCAAAGCAC          |
|    | MPI             | AAGAAGTGCTTCACCAGGATG        | CACACGGGAAGATTTTGGAG         |
|    | CAT             | ACATGGTGTGGGACTTCTGG         | AGCCGTAGCCGTTTCATGTGG        |
| 17 | AU168434        | TGGAGCTTGGACCAAAGCCAGATGTTGC | GGAAGTGGAGTGGACTCACACGCAGA   |
|    | OLb0909b        | AGGTGCCGAGCTTGTGAAGCG        | ATCTGCACCGGGACGATTTGGC       |
|    | NOL7            | AGGAGTTGTTTCAAGAGCAGAAG      | CGTCGTCACCGTGTAGTTTC         |
|    | PEX5L           | GCTCTGGACTTGGTGGACCTC        | AGCAGCTCGCTGGATGAGTG         |
|    | NOP9            | TCTTGGCTGCAGGTCACATG         | CAGGCTGCTGAGGAGAAGCGA        |
| 19 | MF01SSA017B03-3 | GGTGACTGGGTTTCAGCCGCAGGATGT  | CCCCACGTTTTCCGGGGTTTCATAGCGA |
| 23 | MEST            | TCTGGTTTCCCATGACTACGG        | GTCCACATGTCCAGAACTC          |
|    | AMDHD1          | CCCATCAACATCTCCTCCAC         | TAGGCAGCGTTGATGGTGGC         |
|    | OcelKCNJ8       | TCATCATCTGCCACGTCATAG        | GGCTTCTCGTCCAGCTCTC          |
|    | KIN             | TGTCACTGCATGTCCGAGTC         | TTCTTCTCCTCGCCAGCTCC         |
|    | CCT2            | GATCTACAACTACCCGGAGCAG       | CTTGCCTGGCGTCTGTGG           |
